# Supplementary material
Source: PubMed Central journal article supplement (PMC5815902)
Supplement: NIHMS917590-supplement-supplement_1.pdf [file NIHMS917590-supplement-supplement_1.pdf]

**SUPPLEMENTAL DATA**

Corresponding to: Merkel Cell Carcinoma: Current United States Incidence and Projected Increases based on Changing Demographics

| MEN         | US Census Population Forecast (Thousands) |        |        | MCC Incidence Rate (per 100,000) | Predicted Number MCC Cases |      |      |
|-------------|-------------------------------------------|--------|--------|----------------------------------|----------------------------|------|------|
|             | 2015                                      | 2020   | 2025   | 2011-2013                        | 2015                       | 2020 | 2025 |
| 00-04 years | 10,211                                    | 10,520 | 10,747 | 0                                | 0                          | 0    | 0    |
| 05-09 years | 10,448                                    | 10,360 | 10,676 | 0                                | 0                          | 0    | 0    |
| 10-14 years | 10,513                                    | 10,584 | 10,500 | 0                                | 0                          | 0    | 0    |
| 15-19 years | 10,796                                    | 10,749 | 10,835 | 0                                | 0                          | 0    | 0    |
| 20-24 years | 11,678                                    | 11,300 | 11,290 | 0                                | 0                          | 0    | 0    |
| 25-29 years | 11,447                                    | 12,161 | 11,818 | 0                                | 0                          | 0    | 0    |
| 30-34 years | 10,906                                    | 11,781 | 12,510 | 0                                | 0                          | 0    | 0    |
| 35-39 years | 10,181                                    | 11,099 | 11,979 | 0                                | 0                          | 0    | 0    |
| 40-44 years | 10,025                                    | 10,272 | 11,193 | 0.1                              | 10                         | 10   | 11   |
| 45-49 years | 10,324                                    | 10,010 | 10,266 | 0.1                              | 10                         | 10   | 10   |
| 50-54 years | 10,955                                    | 10,182 | 9,889  | 0.3                              | 33                         | 31   | 30   |
| 55-59 years | 10,601                                    | 10,651 | 9,929  | 0.7                              | 74                         | 75   | 70   |
| 60-64 years | 9,131                                     | 10,147 | 10,229 | 1.4                              | 128                        | 142  | 143  |
| 65-69 years | 7,612                                     | 8,567  | 9,556  | 2.6                              | 198                        | 223  | 248  |
| 70-74 years | 5,306                                     | 6,900  | 7,804  | 4.1                              | 218                        | 283  | 320  |
| 75-79 years | 3,615                                     | 4,538  | 5,938  | 7                                | 253                        | 318  | 416  |
| 80-84 years | 2,417                                     | 2,783  | 3,529  | 12.1                             | 292                        | 337  | 427  |
| 85+ years   | 2,181                                     | 2,432  | 2,802  | 17.7                             | 386                        | 430  | 496  |

| WOMEN       | US Census Population Forecast (Thousands) |        |        | MCC Incidence Rate (per 100,000) | Predicted Number MCC Cases |      |      |
|-------------|-------------------------------------------|--------|--------|----------------------------------|----------------------------|------|------|
|             | 2015                                      | 2020   | 2025   | 2011-2013                        | 2015                       | 2020 | 2025 |
| 00-04 years | 9,755                                     | 10,047 | 10,264 | 0                                | 0                          | 0    | 0    |
| 05-09 years | 10,015                                    | 9,914  | 10,214 | 0                                | 0                          | 0    | 0    |
| 10-14 years | 10,076                                    | 10,150 | 10,055 | 0                                | 0                          | 0    | 0    |
| 15-19 years | 10,297                                    | 10,299 | 10,384 | 0                                | 0                          | 0    | 0    |
| 20-24 years | 11,062                                    | 10,759 | 10,787 | 0                                | 0                          | 0    | 0    |
| 25-29 years | 11,026                                    | 11,561 | 11,284 | 0                                | 0                          | 0    | 0    |
| 30-34 years | 10,753                                    | 11,387 | 11,940 | 0                                | 0                          | 0    | 0    |
| 35-39 years | 10,166                                    | 10,961 | 11,607 | 0                                | 0                          | 0    | 0    |
| 40-44 years | 10,153                                    | 10,296 | 11,098 | 0.1                              | 10                         | 10   | 11   |
| 45-49 years | 10,493                                    | 10,195 | 10,347 | 0.1                              | 10                         | 10   | 10   |
| 50-54 years | 11,356                                    | 10,456 | 10,174 | 0.2                              | 23                         | 21   | 20   |
| 55-59 years | 11,210                                    | 11,228 | 10,365 | 0.4                              | 45                         | 45   | 41   |
| 60-64 years | 9,962                                     | 10,993 | 11,036 | 0.7                              | 70                         | 77   | 77   |
| 65-69 years | 8,482                                     | 9,626  | 10,646 | 1.1                              | 93                         | 106  | 117  |
| 70-74 years | 6,193                                     | 7,982  | 9,088  | 1.9                              | 118                        | 152  | 173  |
| 75-79 years | 4,512                                     | 5,574  | 7,216  | 3.1                              | 140                        | 173  | 224  |
| 80-84 years | 3,389                                     | 3,744  | 4,662  | 3.6                              | 122                        | 135  | 168  |
| 85+ years   | 4,123                                     | 4,294  | 4,680  | 5.8                              | 239                        | 249  | 271  |

**Supplemental Table 1:** Calculation of Predicted Number MCC cases by Age and Sex. MCC cases are number of incident cases per year in the US for each of the listed years, in each age and sex category. Total number of predicted incident MCC cases are 2,472 in 2015, 2,835 in 2020, and 3,284 in 2025 (sum in table varies slightly due to rounding).

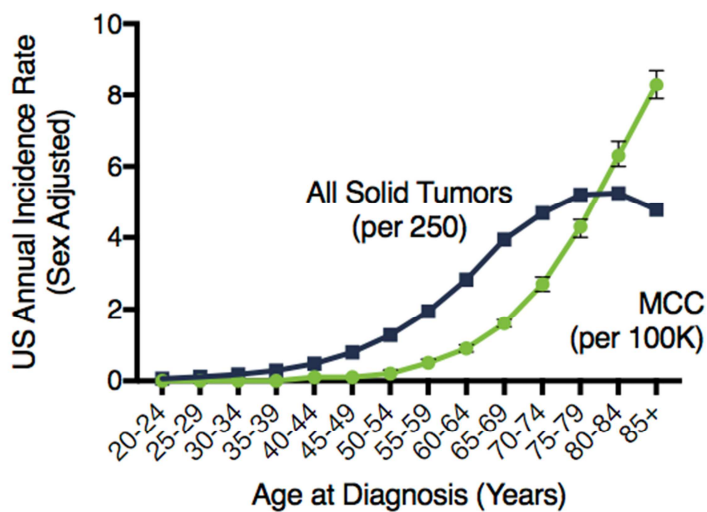

**Supplemental Figure 1: Merkel cell carcinoma disproportionately impacts individuals  $\geq 65$  years of age as compared to all solid tumors.** Incidence rate by age is shown for Merkel cell carcinoma (green circles, per 100,000 persons) and all solid tumors (blue squares, per 250 persons). N=6,600 cases of Merkel cell carcinoma (all cases reported to SEER between 2000-2013 with associated age and sex information). MCC line is identical to figure 2A; however All Solid Tumors is now shown instead of melanoma as comparator.
